# Supplementary material
Source: PubMed Central journal article supplement (PMC7718435)
Supplement: NIHMS1641973-supplement-1.pdf [file NIHMS1641973-supplement-1.pdf]

# Supplementary Materials

## Structure and drug binding of the SARS-CoV-2 envelope protein transmembrane domain in lipid bilayers

Venkata S. Mandala <sup>1</sup>, Matthew J. McKay <sup>1</sup>, Alexander A. Shcherbakov <sup>1</sup>, Aurelio J. Dregni <sup>1</sup>,  
Antonios Kolocouris <sup>2</sup>, Mei Hong <sup>1\*</sup>

<sup>1</sup> Department of Chemistry, Massachusetts Institute of Technology, Cambridge, Massachusetts,  
02139, USA

<sup>2</sup> Department of Pharmaceutical Chemistry, National and Kapodistrian University of Athens,  
Panepistimioupolis Zografou, Athens 15771, Greece

\* Corresponding author: Mei Hong, Professor of Chemistry, email: [meihong@mit.edu](mailto:meihong@mit.edu)

**This PDF file includes:**

Supplementary Tables 1-6 and Supplementary Note 1 containing additional experimental and analysis methods

## Supplementary Tables

**Supplementary Table 1.**  $^{13}\text{C}$  and  $^{15}\text{N}$  chemical shifts (ppm) of ERGIC-bound ETM at pH 7.5. The  $^{13}\text{C}$  and  $^{15}\text{N}$  chemical shift uncertainties are  $\pm 0.3$  ppm and  $\pm 0.5$  ppm, respectively.

| Residue | C $\alpha$ | C $\beta$ | C'    | N     | C $\gamma$ / $\gamma$ 1 | C $\gamma$ 2 | C $\delta$ / $\delta$ 1 | C $\delta$ 2 | C $\epsilon$ / C $\epsilon$ 1 | C $\epsilon$ 2/ $\zeta$ | N $\delta$ |
|---------|------------|-----------|-------|-------|-------------------------|--------------|-------------------------|--------------|-------------------------------|-------------------------|------------|
| E8      |            |           |       |       | 33.6                    |              | 181.1                   |              |                               |                         |            |
| T9      | 61.5       | 67.2      |       | 117.5 |                         |              |                         |              |                               |                         |            |
| G10     | 44.8       |           | 172.7 | 110.7 |                         |              |                         |              |                               |                         |            |
| T11     | 62.5       | 66.5      | 173.4 | 113.5 |                         | 20.4         |                         |              |                               |                         |            |
| L12     | 55.7       | 39.4      |       | 121.9 | 25.0                    |              |                         |              |                               |                         |            |
| I13     | 62.1       | 35.3      | 175.1 | 119.9 | 27.1                    | 15.9         | 10.9                    |              |                               |                         |            |
| V14     | 64.9       | 29.2      | 174.7 | 119.6 | 21.3                    | 18.8         |                         |              |                               |                         |            |
| N15     | 53.9       | 35.4      | 175.4 | 117.1 | 172.2                   |              |                         |              |                               |                         | 107.7      |
| S16     | 60.9       | 61.0      | 173.2 | 116.4 |                         |              |                         |              |                               |                         |            |
| V17     | 64.7       | 29.2      | 175.4 | 121.0 | 21.3                    | 19.4         |                         |              |                               |                         |            |
| L18     | 55.6       | 39.0      | 176.7 | 118.6 | 24.7                    |              | 23.4                    | 18.3         |                               |                         |            |
| L19     | 56.1       | 39.9      | 176.0 | 120.5 | 24.9                    |              |                         |              |                               |                         |            |
| F20     | 59.5       | 37.4      | 174.5 | 118.9 | 136.8                   |              | 129.3                   |              | 128.3                         |                         |            |
| L21     | 55.5       | 40.8      | 176.6 | 118.8 | 24.9                    |              | 23.6                    | 20.2         |                               |                         |            |
| A22     | 53.9       | 16.5      | 176.5 | 123.5 |                         |              |                         |              |                               |                         |            |
| F23     | 59.4       | 37.3      | 174.3 | 118.9 | 137.2                   |              | 129.3                   |              | 127.3                         |                         |            |
| V24     | 65.4       | 29.7      | 175.7 | 118.3 | 21.0                    | 18.8         |                         |              |                               |                         |            |
| V25     | 65.6       | 29.1      | 174.8 | 118.9 | 21.1                    | 19.5         |                         |              |                               |                         |            |
| F26     | 60.2       | 37.0      | 175.7 | 119.7 | 137.0                   |              | 129.3                   |              | 128.1                         |                         |            |
| L27     | 55.6       | 39.8      | 175.9 | 120.8 | 25.5                    |              | 23.8                    | 18.6         |                               |                         |            |
| L28     | 55.5       | 39.1      | 176.6 | 118.4 | 23.5                    |              | 23.4                    | 18.8         |                               |                         |            |
| V29     | 64.3       | 28.7      | 175.0 | 119.4 | 22.2                    | 19.4         |                         |              |                               |                         |            |
| T30     | 66.9       | 64.4      | 173.5 | 119.2 |                         | 18.2         |                         |              |                               |                         |            |
| L31     | 56.5       | 39.5      | 176.1 | 121.7 | 25.3                    |              | 25.2                    | 22.3         |                               |                         |            |
| A32     | 53.3       | 16.5      | 177.0 | 123.6 |                         |              |                         |              |                               |                         |            |
| I33     | 63.6       | 36.1      | 175.0 | 117.6 | 28.9                    | 17.1         | 12.2                    |              |                               |                         |            |
| L34     | 55.9       | 38.8      | 176.5 | 117.0 | 25.6                    |              | 25.5                    | 21.5         |                               |                         |            |
| T35     | 60.9       | 67.4      | 173.6 | 102.2 |                         | 19.8         |                         |              |                               |                         |            |
| A36     | 51.6       | 17.6      | 176.9 | 123.1 |                         |              |                         |              |                               |                         |            |
| L37     | 51.3       | 36.6      | 171.0 | 119.5 | 24.4                    |              | 23.3                    | 19.9         |                               |                         |            |
| R38     | 51.8       | 27.9      | 178.9 | 124.4 | 23.5                    |              | 39.6                    |              |                               |                         | 157.3      |

**Supplementary Table 2.** Interhelical  $^1\text{H}$ - $^1\text{H}$  distance restraints obtained from the NHC spectra. The direction of the interhelical contact from the  $^{15}\text{N}$  to the  $^{13}\text{C}$  is indicated as 'CCW' for counter-clockwise, 'CW' for clockwise, and 'Ambig' for either of the two neighboring helices during structure calculation. "/" in atom designations indicates ambiguous assignment.

| Source ( $^{15}\text{N}$ ) | Sink ( $^{13}\text{C}$ ) | Direction | $^1\text{H}$ - $^1\text{H}$ SD time (us) | Distance (Å) | Lower Error (Å) | Upper Error (Å) |
|----------------------------|--------------------------|-----------|------------------------------------------|--------------|-----------------|-----------------|
| L12N                       | T11CA                    | CCW       | 500                                      | 6.0          | 3.0             | 3.0             |
| S16N                       | L18CA                    | CCW       | 500                                      | 6.0          | 3.0             | 3.0             |
| V14N                       | S16CB                    | CW        | 500                                      | 6.0          | 3.0             | 3.0             |
| A32N                       | L31CA                    | CCW       | 500                                      | 6.0          | 3.0             | 3.0             |
| L21N                       | A22CA                    | CW        | 500                                      | 6.0          | 3.0             | 3.0             |
| L31N                       | V29CA                    | CW        | 500                                      | 6.0          | 3.0             | 3.0             |
| V29N                       | T30CB                    | CCW       | 1000                                     | 6.0          | 3.0             | 5.5             |
| S16N                       | V14CB                    | CCW       | 500                                      | 6.0          | 3.0             | 3.0             |
| V14N                       | N15CB                    | CW        | 500                                      | 6.0          | 3.0             | 3.0             |
| L28N/V29N                  | T30CA                    | Ambig     | 500                                      | 6.0          | 3.0             | 3.0             |
| V25N                       | L21CB                    | CCW       | 1000                                     | 6.0          | 3.0             | 5.5             |
| A22N                       | F20CB/F23CB              | CCW       | 1000                                     | 6.0          | 3.0             | 5.5             |
| S16N                       | T11CG2/L21CD2            | CCW       | 1000                                     | 6.0          | 3.0             | 5.5             |
| N15N                       | V14CA/V17CA              | CCW       | 1000                                     | 6.0          | 3.0             | 5.5             |
| L34N                       | A36CA                    | CW        | 1000                                     | 6.0          | 3.0             | 5.5             |
| I33N/L34N                  | T35CA                    | Ambig     | 1000                                     | 6.0          | 3.0             | 5.5             |
| L21N                       | A22CB                    | CW        | 1000                                     | 6.0          | 3.0             | 5.5             |
| L27N                       | V25CA                    | CW        | 1000                                     | 6.0          | 3.0             | 5.5             |
| A22N                       | V17CB                    | CCW       | 1000                                     | 6.0          | 3.0             | 5.5             |
| A32N/A36N                  | I33CG2                   | Ambig     | 1000                                     | 6.0          | 3.0             | 5.5             |
| L27N                       | F26CA                    | CW        | 1000                                     | 6.0          | 3.0             | 5.5             |
| L31N                       | L37CA                    | CW        | 1000                                     | 6.0          | 3.0             | 5.5             |
| T30N/L37N                  | R38CA                    | Ambig     | 1000                                     | 6.0          | 3.0             | 5.5             |
| L37N                       | T35CB                    | Ambig     | 1000                                     | 6.0          | 3.0             | 5.5             |
| L21N/F23N                  | V25CA                    | CCW       | 1000                                     | 6.0          | 3.0             | 5.5             |
| A32N                       | A36CA/R38CA              | Ambig     | 1000                                     | 6.0          | 3.0             | 5.5             |
| L34N                       | I33CG1                   | Ambig     | 1000                                     | 6.0          | 3.0             | 5.5             |
| L31N                       | V29CB                    | CW        | 1000                                     | 6.0          | 3.0             | 5.5             |
| L27N                       | V29CB                    | CW        | 1000                                     | 6.0          | 3.0             | 5.5             |
| N15N                       | S16CA                    | CW        | 500                                      | 6.0          | 3.0             | 3.0             |
| S16N                       | L21CB                    | CCW       | 1000                                     | 6.0          | 3.0             | 5.5             |
| L19N                       | V17CA                    | CCW       | 500                                      | 6.0          | 3.0             | 3.0             |
| N15N                       | L18CA                    | Ambig     | 500                                      | 6.0          | 3.0             | 3.0             |
| S16N                       | L18CB                    | CCW       | 500                                      | 6.0          | 3.0             | 3.0             |
| V17N                       | L18CA/L19CA              | Ambig     | 500                                      | 6.0          | 3.0             | 3.0             |
| L19N                       | S16CA                    | CW        | 500                                      | 6.0          | 3.0             | 3.0             |
| L31N                       | I33CG1                   | CW        | 500                                      | 6.0          | 3.0             | 3.0             |
| A32N                       | T35CG2                   | Ambig     | 500                                      | 6.0          | 3.0             | 3.0             |
| A32N/R38N                  | I33CG2                   | Ambig     | 500                                      | 6.0          | 3.0             | 3.0             |

|           |           |       |      |     |     |     |
|-----------|-----------|-------|------|-----|-----|-----|
| S16N      | L18CD2    | CCW   | 500  | 6.0 | 3.0 | 3.0 |
| I33N/L34N | T35CB     | Ambig | 1000 | 6.0 | 3.0 | 5.5 |
| L31N      | A32CB     | CW    | 1000 | 6.0 | 3.0 | 5.5 |
| A32N      | A32CB     | Ambig | 1000 | 6.0 | 3.0 | 5.5 |
| A32N/R38N | A36CA     | Ambig | 1000 | 6.0 | 3.0 | 5.5 |
| T35N      | T35CG2    | Ambig | 1000 | 6.0 | 3.0 | 5.5 |
| L31N      | I33CB     | CW    | 1000 | 6.0 | 3.0 | 5.5 |
| L31N      | T30CA     | Ambig | 1000 | 6.0 | 3.0 | 5.5 |
| A32N      | T35CA     | Ambig | 1000 | 6.0 | 3.0 | 5.5 |
| A32N      | T35CB     | Ambig | 1000 | 6.0 | 3.0 | 5.5 |
| A32N/R38N | L34CG     | Ambig | 1000 | 6.0 | 3.0 | 5.5 |
| A22N      | F20C/F23C | CCW   | 1000 | 6.0 | 3.0 | 5.5 |
| L28N      | T30CG2    | Ambig | 1000 | 6.0 | 3.0 | 5.5 |

**Supplementary Table 3.** Interhelical  $^{13}\text{C}$ - $^{19}\text{F}$  distance restraints. Positive contacts are  $^{13}\text{C}$  sites that show significant REDOR dephasing while negative contacts are sites that do not show significant REDOR dephasing and are thus far from all  $^{19}\text{F}$  spins. The direction of the interhelical contact from the  $^{19}\text{F}$  spin to  $^{13}\text{C}$  is indicated as 'CCW' for counter-clockwise, The experiments that yielded these constraints include broadband  $^{13}\text{C}$ - $^{19}\text{F}$  REDOR (BB),  $\text{C}\alpha$ -selective  $^{13}\text{C}$ - $^{19}\text{F}$  REDOR ( $\text{C}\alpha$ -sel), and water-edited and lipid-edited (Water/lipid) experiments. "/" in atom designations indicates ambiguous assignment.

| Dephasing Atom ( $^{19}\text{F}$ ) | Dephased Site ( $^{13}\text{C}$ ) | Direction | Experiment               | Distance (Å) | Lower Error (Å) | Upper Error (Å) | Contact Type |
|------------------------------------|-----------------------------------|-----------|--------------------------|--------------|-----------------|-----------------|--------------|
| F20HZ                              | I13CA                             | Ambig     | 2D $\text{C}\alpha$ -sel | 12.0         | 4.7             | 38.0            | negative     |
| F20HZ                              | N15CA                             | Ambig     | 2D $\text{C}\alpha$ -sel | 9.1          | 2.0             | 40.9            | negative     |
| F20HZ                              | S16CA                             | Ambig     | 2D $\text{C}\alpha$ -sel | 12.0         | 4.0             | 38.0            | negative     |
| F20HZ                              | V17CA                             | Ambig     | 2D $\text{C}\alpha$ -sel | 7.7          | 2.0             | 2.0             | positive     |
| F26HZ                              | F23CA                             | CCW       | 2D $\text{C}\alpha$ -sel | 6.8          | 2.0             | 2.0             | positive     |
| F20HZ                              | L21CA                             | Ambig     | 2D $\text{C}\alpha$ -sel | 6.6          | 2.0             | 2.0             | positive     |
| F20HZ/F23HZ                        | A22CA                             | CW        | 2D $\text{C}\alpha$ -sel | 6.5          | 2.0             | 2.0             | positive     |
| F26HZ                              | V24CA                             | CCW       | 2D $\text{C}\alpha$ -sel | 6.7          | 2.0             | 2.0             | positive     |
| F23HZ                              | V25CA                             | CW        | 2D $\text{C}\alpha$ -sel | 6.7          | 2.0             | 2.0             | positive     |
| F23HZ                              | F26CA                             | CW        | 2D $\text{C}\alpha$ -sel | 6.5          | 2.6             | 2.0             | positive     |
| F20HZ/F23HZ/<br>F26HZ              | L18CA/L27C<br>A/L28CA             | Ambig     | 2D $\text{C}\alpha$ -sel | 7.2          | 2.0             | 2.0             | positive     |
| F23HZ/F26HZ                        | V29CA                             | Ambig     | 2D $\text{C}\alpha$ -sel | 7.7          | 2.0             | 2.0             | positive     |
| F26HZ                              | T30CB                             | CCW       | 2D $\text{C}\alpha$ -sel | 7.1          | 2.0             | 2.0             | positive     |
| F26HZ                              | T30CA                             | Ambig     | 2D $\text{C}\alpha$ -sel | 8.5          | 2.0             | 41.5            | negative     |
| F26HZ                              | L31CA                             | Ambig     | 2D $\text{C}\alpha$ -sel | 7.5          | 2.0             | 42.5            | negative     |
| F26HZ                              | A32CA                             | Ambig     | 2D $\text{C}\alpha$ -sel | 9.5          | 2.0             | 40.5            | negative     |
| F26HZ                              | I33CA                             | Ambig     | 2D $\text{C}\alpha$ -sel | 10.9         | 2.7             | 39.1            | negative     |
| F26HZ                              | T35CB                             | Ambig     | 2D $\text{C}\alpha$ -sel | 12.0         | 4.8             | 38.0            | negative     |
| F26HZ                              | T35CA                             | Ambig     | 2D $\text{C}\alpha$ -sel | 12.0         | 4.5             | 38.0            | negative     |
| F20HZ                              | I13CD1                            | Ambig     | 1D BB                    | 12.0         | 2.0             | 38.0            | negative     |
| F20HZ                              | I13CG2                            | Ambig     | 1D BB                    | 8.3          | 2.0             | 41.7            | negative     |
| F20HZ/F23HZ/<br>F26HZ              | L21CB                             | Ambig     | 1D BB                    | 6.1          | 2.0             | 2.0             | positive     |
| F20HZ                              | A22CB                             | CW        | 1D BB                    | 5.7          | 2.0             | 2.0             | positive     |
| F26HZ                              | T30CG2                            | CCW       | 1D BB                    | 5.9          | 2.0             | 2.0             | positive     |
| F26HZ                              | I33CD1                            | Ambig     | 1D BB                    | 12.0         | 2.0             | 38.0            | negative     |
| F26HZ                              | A36CA                             | Ambig     | 1D $\text{C}\alpha$ -sel | 12.0         | 2.0             | 38.0            | negative     |
| F26HZ                              | L37CA                             | Ambig     | 1D $\text{C}\alpha$ -sel | 12.0         | 2.0             | 38.0            | negative     |
| F26HZ                              | R38CA                             | Ambig     | 1D $\text{C}\alpha$ -sel | 12.0         | 2.0             | 38.0            | negative     |
| F26HZ                              | R38CB                             | Ambig     | 1D BB                    | 12.0         | 3.4             | 38.0            | negative     |
| F26HZ                              | R38CZ                             | Ambig     | 1D BB                    | 12.0         | 3.4             | 38.0            | negative     |
| F23HZ                              | F26CE#/F26<br>CZ                  | CW        | 1D BB                    | 3.3          | 2.0             | 2.0             | positive     |
| F26HZ                              | L31CD2                            | CCW       | 1D BB                    | 6.4          | 2.0             | 2.0             | positive     |
| F26HZ                              | F26HZ                             | Ambig     | Water/lipid              | 12.0         | 3.0             | 38.0            | negative     |
| F20HZ                              | F20HZ                             | Ambig     | Water/lipid              | 12.0         | 3.0             | 38.0            | negative     |
| F23HZ                              | F23HZ                             | Ambig     | Water/lipid              | 12.0         | 3.0             | 38.0            | negative     |

**Supplementary Table 4.** Agreement of the various pentamer models (Extended Data Figure 7) with experimental  $^{13}\text{C}$ - $^{19}\text{F}$  data and water-edited 2D NCA spectra.

| <b>Model</b>                                 | <b>Unsatisfied <math>^{13}\text{C}</math>-<math>^{19}\text{F}</math> Constraints</b>                                                                                                                                                                                                                                                                 | <b>Unsatisfied Water-Edited Constraints</b>                                                                                                                                                                         |
|----------------------------------------------|------------------------------------------------------------------------------------------------------------------------------------------------------------------------------------------------------------------------------------------------------------------------------------------------------------------------------------------------------|---------------------------------------------------------------------------------------------------------------------------------------------------------------------------------------------------------------------|
| 1: N15 <i>d</i> ,<br>no twist                | No intermolecular Phe-Phe contact in this model.                                                                                                                                                                                                                                                                                                     | V29 is pore-facing in the model but is poorly hydrated in the water-edited 2D NCA spectra;<br>L31 and T35 are more lipid-facing in the model but are well hydrated in the water-edited spectra.                     |
| 2: N15 <i>d</i> ,<br>F23 <i>e</i> → <i>c</i> | This model requires the resolved -118 ppm $^{19}\text{F}$ peak to be assigned to F26. Under this condition, the F26HZ – A22 CB cross peak in the 2D C-F spectrum cannot be explained.                                                                                                                                                                | V24 is pore-facing and V25 is interfacial in this model, but water-edited spectra show that V25 is better hydrated than V24.                                                                                        |
| 3: N15 <i>e</i> ,<br>F23 <i>f</i> → <i>b</i> | This model requires the resolved -118 ppm $^{19}\text{F}$ peak to be assigned to F26. Under this condition, the F26HZ – A22 CB cross peak in the 2D C-F spectrum cannot be explained;<br>T30 dephasing by F26 in the C-F REDOR data cannot be explained since T30 and F26 are on the same side of the helix so intermolecular dephasing is unlikely. | L19 is lipid-facing in the model but is well hydrated in the water-edited spectra.<br>T35 is interfacial in the model but is well hydrated in the water-edited spectra.                                             |
| 4: N15 <i>a</i> ,<br>F23 <i>b</i> → <i>c</i> | n/a                                                                                                                                                                                                                                                                                                                                                  | V24 is pore-facing and V25 is interfacial in the model, but water-edited spectra indicate that V25 is more hydrated than V24;<br>L19 is interfacial in the model, but is well hydrated in the water-edited spectra. |
| 5: N15 <i>a</i> ,<br>F23 <i>b</i> → <i>f</i> | n/a                                                                                                                                                                                                                                                                                                                                                  | L19 is interfacial in the model, but is well hydrated in the water-edited spectra.                                                                                                                                  |

**Supplementary Table 5.** XPLOR-NIH parameters for ETM structure calculations.

| <b>XPLOR-NIH Potential</b> | <b>Experimental Basis</b>                                              | <b>Restraints per monomer</b> | <b>Round 1 Scale Factor</b> | <b>Round 2 Scale Factor</b> | <b>Best model energy (kcal/mol)</b> |
|----------------------------|------------------------------------------------------------------------|-------------------------------|-----------------------------|-----------------------------|-------------------------------------|
| PosDiffPot (ncs)           | Single set of chemical shifts                                          | -                             | 100                         | 100                         | 0.83                                |
| DistSymmPot                | Single set of chemical shifts                                          | -                             | 100                         | 100                         | 0.69                                |
| CDIH (dihedral angles)     | TALOS-N predictions                                                    | 56                            | 400                         | 400                         | 1.43                                |
| NOE                        | Intermolecular NHHC contacts                                           | 52                            | 0.01-20                     | 0.5-30                      | 186.55                              |
| NOE                        | Intermolecular <sup>13</sup> C- <sup>19</sup> F REDOR                  | 35                            | 0.01-20                     | 0.5-30                      |                                     |
| NOE                        | Intramolecular inter-residue <sup>13</sup> C- <sup>13</sup> C contacts | 196                           | 0                           | 0.17-10                     |                                     |
| HBDB                       | $\alpha$ -helical TM for residues 13-19, 23-34                         | 11                            | 1                           | 1                           | -177.09                             |
| TorsionDB                  | Database favored side-chain rotamers                                   | -                             | 0.0001-0.1                  | 0.01-3                      | 7676.28                             |
| BOND                       | Standard bond lengths                                                  | -                             | 1                           | 1                           | 36.36                               |
| ANGL                       | Standard bond angles                                                   | -                             | 0.4-1                       | 0.4-1                       | 233.32                              |
| IMPR                       | Standard bond geometry                                                 | -                             | 0.1-1                       | 0.1-1                       | 26.70                               |
| RepelPot                   | Non-bonded atomic radii repulsion                                      | -                             | 0.004-4                     | 0.006-6                     | 73.15                               |

**Supplementary Table 6.** Detailed solid-state NMR experimental parameters for bilayer-bound ETM.

| Sample                                                           | Experiment                                                                                                                                                                                                                                                                                                                                                                                                                                                                                        | NMR Parameters                                                                                                                                                                                                                                                                                                                                                                                                                                                                                                                                                                           | Experimental Time |
|------------------------------------------------------------------|---------------------------------------------------------------------------------------------------------------------------------------------------------------------------------------------------------------------------------------------------------------------------------------------------------------------------------------------------------------------------------------------------------------------------------------------------------------------------------------------------|------------------------------------------------------------------------------------------------------------------------------------------------------------------------------------------------------------------------------------------------------------------------------------------------------------------------------------------------------------------------------------------------------------------------------------------------------------------------------------------------------------------------------------------------------------------------------------------|-------------------|
| pH 7.5, ERGIC, U- <sup>13</sup> C, <sup>15</sup> N-labeled ETM   | 2D CC short CORD, high T                                                                                                                                                                                                                                                                                                                                                                                                                                                                          | $B_0 = 21.1$ T; $T_{\text{bearing}} = 293$ K; $V_{\text{MAS}} = 11.8$ kHz, $ns = 72$ , $T_{\text{rd}} = 1.7$ s, $t_{1,\text{max}} = 4.4$ ms; $t_{1,\text{inc}} = 25.0$ $\mu$ s; $T_{\text{dwell}} = 6.0$ $\mu$ s; $T_{\text{acq}} = 10.2$ ms; $T_{\text{HC}} = 0.5$ ms; $T_{\text{CORD}} = 20$ ms; $V_{1\text{Hacq}} = 71$ kHz                                                                                                                                                                                                                                                           | 14 hrs            |
|                                                                  | 2D CC short CORD, low T                                                                                                                                                                                                                                                                                                                                                                                                                                                                           | $B_0 = 21.1$ T; $T_{\text{bearing}} = 263$ K; $V_{\text{MAS}} = 11.8$ kHz, $ns = 64$ , $T_{\text{rd}} = 1.7$ s, $t_{1,\text{max}} = 5.0$ ms; $t_{1,\text{inc}} = 25.0$ $\mu$ s; $T_{\text{dwell}} = 6.0$ $\mu$ s; $T_{\text{acq}} = 10.2$ ms; $T_{\text{HC}} = 0.5$ ms; $T_{\text{CORD}} = 20$ ms; $V_{1\text{Hacq}} = 71$ kHz                                                                                                                                                                                                                                                           | 12 hrs            |
|                                                                  | 2D CC long CORD                                                                                                                                                                                                                                                                                                                                                                                                                                                                                   | $B_0 = 21.1$ T; $T_{\text{bearing}} = 293$ K; $V_{\text{MAS}} = 11.8$ kHz, $ns = 160$ , $T_{\text{rd}} = 1.6$ s, $t_{1,\text{max}} = 5.0$ ms; $t_{1,\text{inc}} = 22.1$ $\mu$ s; $T_{\text{dwell}} = 6.0$ $\mu$ s; $T_{\text{acq}} = 12.8$ ms; $T_{\text{HC}} = 0.5$ ms; $T_{\text{CORD}} = 250$ ms; $V_{1\text{Hacq}} = 71$ kHz                                                                                                                                                                                                                                                         | 30 hrs            |
|                                                                  | 2D NCA, high T                                                                                                                                                                                                                                                                                                                                                                                                                                                                                    | $B_0 = 21.1$ T; $T_{\text{bearing}} = 293$ K; $V_{\text{MAS}} = 11.8$ kHz, $ns = 32$ , $T_{\text{rd}} = 2.0$ s, $t_{1,\text{max}} = 8.9$ ms; $t_{1,\text{inc}} = 127$ $\mu$ s; $T_{\text{dwell}} = 5$ $\mu$ s; $T_{\text{acq}} = 15.4$ ms; $T_{\text{HN}} = 0.75$ ms; $T_{\text{CN}} = 4$ ms; $V_{15\text{NspecificCP}} = 30$ kHz; $V_{13\text{CspecificCP}} = 18$ kHz; $V_{1\text{HspecificCP}} = 80$ kHz; $V_{1\text{Hacq}} = 71$ kHz                                                                                                                                                  | 2.5 hrs           |
|                                                                  | 2D NCA, low T                                                                                                                                                                                                                                                                                                                                                                                                                                                                                     | $B_0 = 21.1$ T; $T_{\text{bearing}} = 263$ K; $V_{\text{MAS}} = 11.8$ kHz, $ns = 32$ , $T_{\text{rd}} = 2.0$ s, $t_{1,\text{max}} = 8.9$ ms; $t_{1,\text{inc}} = 127$ $\mu$ s; $T_{\text{dwell}} = 5$ $\mu$ s; $T_{\text{acq}} = 15.4$ ms; $T_{\text{HN}} = 0.75$ ms; $T_{\text{CN}} = 4$ ms; $V_{15\text{NspecificCP}} = 30$ kHz; $V_{13\text{CspecificCP}} = 18$ kHz; $V_{1\text{HspecificCP}} = 80$ kHz; $V_{1\text{Hacq}} = 71$ kHz                                                                                                                                                  | 2.5 hrs           |
|                                                                  | 3D NCACX, 28 ms CORD                                                                                                                                                                                                                                                                                                                                                                                                                                                                              | $B_0 = 21.1$ T; $T_{\text{bearing}} = 293$ K; $V_{\text{MAS}} = 11.8$ kHz, $ns = 8$ , $T_{\text{rd}} = 2.0$ s, $t_{1,\text{max}} = 5.9$ ms; $t_{1,\text{inc}} = 169.5$ $\mu$ s; $t_{2,\text{max}} = 4$ ms; $t_{2,\text{inc}} = 100$ $\mu$ s; $T_{\text{dwell}} = 5$ $\mu$ s; $T_{\text{acq}} = 12.8$ ms; $T_{\text{HN}} = 0.75$ ms; $T_{\text{CN}} = 4$ ms; $V_{15\text{NspecificCP}} = 30$ kHz; $V_{13\text{CspecificCP}} = 18$ kHz; $T_{\text{CORD}} = 28$ ms; $V_{1\text{HspecificCP}} = 80$ kHz; $V_{1\text{Hacq}} = 71$ kHz                                                         | 25 hrs            |
|                                                                  | 3D NCACX, 250 ms CORD                                                                                                                                                                                                                                                                                                                                                                                                                                                                             | $B_0 = 21.1$ T; $T_{\text{bearing}} = 293$ K; $V_{\text{MAS}} = 11.8$ kHz, $ns = 24$ , $T_{\text{rd}} = 2.2$ s, $t_{1,\text{max}} = 4.7$ ms; $t_{1,\text{inc}} = 169.5$ $\mu$ s; $t_{2,\text{max}} = 3.7$ ms; $t_{2,\text{inc}} = 100$ $\mu$ s; $T_{\text{dwell}} = 5$ $\mu$ s; $T_{\text{acq}} = 12.8$ ms; $T_{\text{HN}} = 0.75$ ms; $T_{\text{CN}} = 4$ ms; $V_{15\text{NspecificCP}} = 30$ kHz; $V_{13\text{CspecificCP}} = 18$ kHz; $T_{\text{CORD}} = 250$ ms; $V_{1\text{HspecificCP}} = 80$ kHz; $V_{1\text{Hacq}} = 71$ kHz                                                     | 69 hrs            |
|                                                                  | 3D NCOCX, 37 ms CORD                                                                                                                                                                                                                                                                                                                                                                                                                                                                              | $B_0 = 21.1$ T; $T_{\text{bearing}} = 293$ K; $V_{\text{MAS}} = 11.8$ kHz, $ns = 16$ , $T_{\text{rd}} = 2.0$ s, $t_{1,\text{max}} = 5.9$ ms; $t_{1,\text{inc}} = 169.5$ $\mu$ s; $t_{2,\text{max}} = 4.4$ ms; $t_{2,\text{inc}} = 169.5$ $\mu$ s; $T_{\text{dwell}} = 5$ $\mu$ s; $T_{\text{acq}} = 12.8$ ms; $T_{\text{HN}} = 0.75$ ms; $T_{\text{CN}} = 4$ ms; $V_{15\text{NspecificCP}} = 30$ kHz; $V_{13\text{CspecificCP}} = 42$ kHz; $T_{\text{CORD}} = 37$ ms; $V_{1\text{HspecificCP}} = 80$ kHz; $V_{1\text{Hacq}} = 71$ kHz                                                    | 35 hrs            |
|                                                                  | 3D CONCA                                                                                                                                                                                                                                                                                                                                                                                                                                                                                          | $B_0 = 21.1$ T; $T = 293$ K; $V_{\text{MAS}} = 11.8$ kHz, $ns = 16$ , $T_{\text{rd}} = 2.0$ s, $t_{1,\text{max}} = 4.1$ ms; $t_{1,\text{inc}} = 169.5$ $\mu$ s; $t_{2,\text{max}} = 5.8$ ms; $t_{2,\text{inc}} = 169.5$ $\mu$ s; $T_{\text{dwell}} = 5$ $\mu$ s; $T_{\text{acq}} = 12.9$ ms; $T_{\text{HC}} = 1$ ms; $T_{\text{CN}} = 4$ ms; $V_{15\text{NspecificCP}} = 30$ kHz; $V_{13\text{CspecificCP}} = 42$ kHz; $T_{\text{NC}} = 4$ ms; $V_{15\text{NspecificCP}} = 30$ kHz; $V_{13\text{CspecificCP}} = 18$ kHz; $V_{1\text{HspecificCP}} = 80$ kHz; $V_{1\text{Hacq}} = 71$ kHz | 30 hrs            |
|                                                                  | 1D <sup>13</sup> C CP                                                                                                                                                                                                                                                                                                                                                                                                                                                                             | $B_0 = 21.1$ T; $V_{\text{MAS}} = 11.8$ kHz, $ns = 1024$ , $T_{\text{rd}} = 1.5$ s, $T_{\text{dwell}} = 6$ $\mu$ s; $T_{\text{acq}} = 12.3$ ms; $T_{\text{HC}} = 0.5$ ms; $V_{1\text{Hacq}} = 71$ kHz                                                                                                                                                                                                                                                                                                                                                                                    | 0.4 hrs           |
|                                                                  | 1D <sup>15</sup> N CP                                                                                                                                                                                                                                                                                                                                                                                                                                                                             | $B_0 = 21.1$ T; $V_{\text{MAS}} = 11.8$ kHz, $ns = 1024$ , $T_{\text{rd}} = 1.6$ s, $T_{\text{dwell}} = 12$ $\mu$ s; $T_{\text{acq}} = 12.3$ ms; $T_{\text{HN}} = 0.75$ ms; $V_{1\text{Hacq}} = 71$ kHz                                                                                                                                                                                                                                                                                                                                                                                  | 0.4 hrs           |
|                                                                  | 1D water-edited <sup>13</sup> C CP with 9 ms <sup>1</sup> H SD                                                                                                                                                                                                                                                                                                                                                                                                                                    | $B_0 = 21.1$ T; $T_{\text{bearing}} = 293$ K; $V_{\text{MAS}} = 11.8$ kHz, $ns = 1024$ , $T_{\text{rd}} = 2.0$ s, $T_{\text{dwell}} = 5$ $\mu$ s; $T_{\text{acq}} = 12.8$ ms; $T_{1\text{Hexc}} = 1.7$ ms; $T_{1\text{HSD}} = 9$ ms; $T_{\text{HC}} = 0.5$ ms; $V_{1\text{Hacq}} = 71$ kHz                                                                                                                                                                                                                                                                                               | 0.5 hrs           |
| 1D water-edited <sup>13</sup> C CP with 100 ms <sup>1</sup> H SD | $B_0 = 21.1$ T; $T_{\text{bearing}} = 293$ K; $V_{\text{MAS}} = 11.8$ kHz, $ns = 1024$ , $T_{\text{rd}} = 2.0$ s, $T_{\text{dwell}} = 5$ $\mu$ s; $T_{\text{acq}} = 12.8$ ms; $T_{1\text{Hexc}} = 1.7$ ms; $T_{1\text{HSD}} = 100$ ms; $T_{\text{HC}} = 0.5$ ms; $V_{1\text{Hacq}} = 71$ kHz                                                                                                                                                                                                      | 0.5 hrs                                                                                                                                                                                                                                                                                                                                                                                                                                                                                                                                                                                  |                   |
| 2D water-edited NCA with 9 ms <sup>1</sup> H SD                  | $B_0 = 21.1$ T; $T_{\text{bearing}} = 293$ K; $V_{\text{MAS}} = 11.8$ kHz, $ns = 640$ , $T_{\text{rd}} = 2.0$ s, $t_{1,\text{max}} = 8.5$ ms; $t_{1,\text{inc}} = 169.5$ $\mu$ s; $T_{\text{dwell}} = 5$ $\mu$ s; $T_{\text{acq}} = 12.8$ ms; $T_{1\text{Hexc}} = 1.7$ ms; $T_{1\text{HSD}} = 9$ ms; $T_{\text{HN}} = 0.75$ ms; $T_{\text{NC}} = 4$ ms; $V_{15\text{NspecificCP}} = 30$ kHz; $V_{13\text{CspecificCP}} = 18$ kHz; $V_{1\text{HspecificCP}} = 80$ kHz; $V_{1\text{Hacq}} = 71$ kHz | 46 hrs                                                                                                                                                                                                                                                                                                                                                                                                                                                                                                                                                                                   |                   |



|                                                                                        |                                                                                                                          |                                                                                                                                                                                                                                                                                                                                                                                                                                                                                                                                                                                                      |         |
|----------------------------------------------------------------------------------------|--------------------------------------------------------------------------------------------------------------------------|------------------------------------------------------------------------------------------------------------------------------------------------------------------------------------------------------------------------------------------------------------------------------------------------------------------------------------------------------------------------------------------------------------------------------------------------------------------------------------------------------------------------------------------------------------------------------------------------------|---------|
|                                                                                        | 2D water-edited NCA with 100 ms <sup>1</sup> H SD                                                                        | $B_0 = 21.1 \text{ T}; T_{\text{bearing}} = 293 \text{ K}; \nu_{\text{MAS}} = 11.8 \text{ kHz}, ns = 384, T_{\text{rd}} = 2.0 \text{ s}, t_{1,\text{max}} = 8.5 \text{ ms}; t_{1,\text{inc}} = 169.5 \mu\text{s}; T_{\text{dwell}} = 5 \mu\text{s}; T_{\text{acq}} = 12.8 \text{ ms}; T_{1\text{Hexc}} = 1.7 \text{ ms}; T_{1\text{HSD}} = 100 \text{ ms}; T_{\text{HN}} = 0.75 \text{ ms}; T_{\text{NC}} = 4 \text{ ms}; \nu_{15\text{NspecificCP}} = 30 \text{ kHz}; \nu_{13\text{CspecificCP}} = 18 \text{ kHz}; \nu_{1\text{HspecificCP}} = 80 \text{ kHz}; \nu_{1\text{Hacq}} = 71 \text{ kHz}$ | 23 hrs  |
|                                                                                        | 1D lipid-edited <sup>13</sup> C CP with 10 ms <sup>1</sup> H SD                                                          | $B_0 = 18.8 \text{ T}; T_{\text{bearing}} = 290 \text{ K}; \nu_{\text{MAS}} = 14 \text{ kHz}, ns = 73728, T_{\text{rd}} = 1.6 \text{ s}, T_{\text{dwell}} = 6 \mu\text{s}; T_{\text{acq}} = 12.3 \text{ ms}; T_{1\text{Hexc}} = 2.86 \text{ ms}; T_{1\text{HSD}} = 10 \text{ ms}; T_{\text{HC}} = 0.5 \text{ ms}; \nu_{1\text{Hacq}} = 71 \text{ kHz}$                                                                                                                                                                                                                                               | 35 hrs  |
|                                                                                        | 1D lipid-edited <sup>13</sup> C CP with 100 ms <sup>1</sup> H SD                                                         | $B_0 = 18.8 \text{ T}; T_{\text{bearing}} = 290 \text{ K}; \nu_{\text{MAS}} = 14 \text{ kHz}, ns = 26624, T_{\text{rd}} = 1.6 \text{ s}, T_{\text{dwell}} = 6 \mu\text{s}; T_{\text{acq}} = 12.3 \text{ ms}; T_{1\text{Hexc}} = 2.86 \text{ ms}; T_{1\text{HSD}} = 100 \text{ ms}; T_{\text{HC}} = 0.5 \text{ ms}; \nu_{1\text{Hacq}} = 71 \text{ kHz}$                                                                                                                                                                                                                                              | 12 hrs  |
| pH 7.5, ERGIC, 1 : 1 <sup>15</sup> N-labeled : <sup>13</sup> C-labeled ETM             | NHHC with 0.5 ms <sup>1</sup> H SD                                                                                       | $B_0 = 18.8 \text{ T}; T_{\text{bearing}} = 290 \text{ K}; \nu_{\text{MAS}} = 14 \text{ kHz}, ns = 1792, T_{\text{rd}} = 1.7 \text{ s}, t_{1,\text{max}} = 5.7 \text{ ms}; t_{1,\text{inc}} = 142.9 \mu\text{s}; T_{\text{dwell}} = 6 \mu\text{s}; T_{\text{acq}} = 10.8 \text{ ms}; T_{1\text{HSD}} = 0.5 \text{ ms}; T_{\text{HN}} = 0.75 \text{ ms}; T_{\text{NH}} = 0.75 \text{ ms}; T_{\text{HC}} = 0.5 \text{ ms}; \nu_{1\text{Hacq}} = 71 \text{ kHz}$                                                                                                                                        | 68 hrs  |
|                                                                                        | NHHC with 1 ms <sup>1</sup> H SD                                                                                         | $B_0 = 18.8 \text{ T}; T_{\text{bearing}} = 290 \text{ K}; \nu_{\text{MAS}} = 14 \text{ kHz}, ns = 2176, T_{\text{rd}} = 1.7 \text{ s}, t_{1,\text{max}} = 5.7 \text{ ms}; t_{1,\text{inc}} = 142.9 \mu\text{s}; T_{\text{dwell}} = 6 \mu\text{s}; T_{\text{acq}} = 10.8 \text{ ms}; T_{1\text{HSD}} = 1 \text{ ms}; T_{\text{HN}} = 0.75 \text{ ms}; T_{\text{NH}} = 0.75 \text{ ms}; T_{\text{HC}} = 0.5 \text{ ms}; \nu_{1\text{Hacq}} = 71 \text{ kHz}$                                                                                                                                          | 87 hrs  |
| pH 7.5, ERGIC, 1 : 1, 4- <sup>19</sup> F-Phe : U- <sup>13</sup> C, <sup>15</sup> N ETM | Broadband 1D <sup>13</sup> C- <sup>19</sup> F REDOR, 5.7 ms (S and S <sub>0</sub> pair)                                  | $B_0 = 14.1 \text{ T}; T_{\text{bearing}} = 293 \text{ K}; \nu_{\text{MAS}} = 14 \text{ kHz}, ns = 6144, T_{\text{rd}} = 1.6 \text{ s}, T_{\text{dwell}} = 8 \mu\text{s}; T_{\text{acq}} = 16.4 \text{ ms}; T_{\text{HC}} = 0.5 \text{ ms}; T_{\text{CFREDOR}} = 5.7 \text{ ms}; \nu_{1\text{HREDOR}} = 117 \text{ kHz}; \nu_{1\text{Hacq}} = 71 \text{ kHz}$                                                                                                                                                                                                                                        | 5.5 hrs |
|                                                                                        | 1D Ca-sel <sup>13</sup> C- <sup>19</sup> F REDOR, 10.3 ms (S and S <sub>0</sub> pair)                                    | $B_0 = 14.1 \text{ T}; T_{\text{bearing}} = 293 \text{ K}; \nu_{\text{MAS}} = 14 \text{ kHz}, ns = 2048, T_{\text{rd}} = 1.8 \text{ s}, T_{\text{dwell}} = 8 \mu\text{s}; T_{\text{acq}} = 16.4 \text{ ms}; T_{13\text{Case1}} = 286 \mu\text{s}; T_{\text{HC}} = 0.5 \text{ ms}; T_{\text{CFREDOR}} = 10.3 \text{ ms}; \nu_{1\text{HREDOR}} = 117 \text{ kHz}; \nu_{1\text{Hacq}} = 71 \text{ kHz}$                                                                                                                                                                                                 | 2 hrs   |
|                                                                                        | 2D <sup>13</sup> C- <sup>13</sup> C resolved <sup>13</sup> C- <sup>19</sup> F REDOR, 10.3 ms (S and S <sub>0</sub> pair) | $B_0 = 14.1 \text{ T}; T_{\text{bearing}} = 293 \text{ K}; \nu_{\text{MAS}} = 14 \text{ kHz}, ns = 448, T_{\text{rd}} = 1.8 \text{ s}, t_{1,\text{max}} = 5.4 \text{ ms}; t_{1,\text{inc}} = 64 \mu\text{s}; T_{\text{dwell}} = 8 \mu\text{s}; T_{\text{acq}} = 14.3 \text{ ms}; T_{13\text{Case1}} = 286 \mu\text{s}; T_{\text{HC}} = 0.4 \text{ ms}; T_{\text{CFREDOR}} = 10.3 \text{ ms}; \nu_{1\text{HREDOR}} = 117 \text{ kHz}; \nu_{1\text{Hacq}} = 71 \text{ kHz}$                                                                                                                            | 76 hrs  |
|                                                                                        | 2D <sup>13</sup> C- <sup>19</sup> F double-quantum CP correlation                                                        | $B_0 = 14.1 \text{ T}; T_{\text{bearing}} = 270 \text{ K}; \nu_{\text{MAS}} = 38 \text{ kHz}, ns = 592, T_{\text{rd}} = 2.0 \text{ s}, t_{1,\text{max}} = 3.7 \text{ ms}; t_{1,\text{inc}} = 33 \mu\text{s}; T_{\text{dwell}} = 3 \mu\text{s}; T_{\text{acq}} = 6.1 \text{ ms}; T_{\text{HC}} = 1 \text{ ms}; T_{\text{CF}} = 7 \text{ ms}; \nu_{19\text{F-CP}} = 13 \text{ kHz}; \nu_{13\text{C-CP}} = 25 \text{ kHz}; \nu_{1\text{H-CP}} = 117 \text{ kHz}; \nu_{1\text{Hacq}} = 71 \text{ kHz}$                                                                                                   | 79 hrs  |
| pH 7.5, DMPX                                                                           | 1D <sup>13</sup> C CP                                                                                                    | $B_0 = 18.8 \text{ T}; \nu_{\text{MAS}} = 14 \text{ kHz}, ns = 1024, T_{\text{rd}} = 1.5 \text{ s}, T_{\text{dwell}} = 6 \mu\text{s}; T_{\text{acq}} = 12.3 \text{ ms}; T_{\text{HC}} = 0.5 \text{ ms}; \nu_{1\text{Hacq}} = 71 \text{ kHz}$                                                                                                                                                                                                                                                                                                                                                         | 0.4 hrs |
|                                                                                        | 1D <sup>13</sup> C DP                                                                                                    | $B_0 = 18.8 \text{ T}; \nu_{\text{MAS}} = 14 \text{ kHz}, ns = 1024, T_{\text{rd}} = 2.0 \text{ s}, T_{\text{dwell}} = 6 \mu\text{s}; T_{\text{acq}} = 12.3 \text{ ms}; \nu_{1\text{Hacq}} = 71 \text{ kHz}$                                                                                                                                                                                                                                                                                                                                                                                         | 0.5 hrs |
|                                                                                        | 1D <sup>15</sup> N CP                                                                                                    | $B_0 = 18.8 \text{ T}; \nu_{\text{MAS}} = 14 \text{ kHz}, ns = 1024, T_{\text{rd}} = 1.6 \text{ s}, T_{\text{dwell}} = 15 \mu\text{s}; T_{\text{acq}} = 12 \text{ ms}; T_{\text{HN}} = 0.75 \text{ ms}; \nu_{1\text{Hacq}} = 71 \text{ kHz}$                                                                                                                                                                                                                                                                                                                                                         | 0.4 hrs |
|                                                                                        | 2D CC short CORD, high T                                                                                                 | $B_0 = 18.8 \text{ T}; T_{\text{bearing}} = 305 \text{ K}; \nu_{\text{MAS}} = 14 \text{ kHz}, ns = 96, T_{\text{rd}} = 1.6 \text{ s}, t_{1,\text{max}} = 6.2 \text{ ms}; t_{1,\text{inc}} = 25.0 \mu\text{s}; T_{\text{dwell}} = 6.0 \mu\text{s}; T_{\text{acq}} = 12.2 \text{ ms}; T_{\text{HC}} = 0.5 \text{ ms}; T_{\text{CORD}} = 20 \text{ ms}; \nu_{1\text{Hacq}} = 71 \text{ kHz}$                                                                                                                                                                                                            | 17 hrs  |
|                                                                                        | 2D CC short CORD, low T                                                                                                  | $B_0 = 18.8 \text{ T}; T_{\text{bearing}} = 263 \text{ K}; \nu_{\text{MAS}} = 14 \text{ kHz}, ns = 96, T_{\text{rd}} = 1.6 \text{ s}, t_{1,\text{max}} = 6.2 \text{ ms}; t_{1,\text{inc}} = 25.0 \mu\text{s}; T_{\text{dwell}} = 10.0 \mu\text{s}; T_{\text{acq}} = 12.2 \text{ ms}; T_{\text{HC}} = 0.5 \text{ ms}; T_{\text{CORD}} = 20 \text{ ms}; \nu_{1\text{Hacq}} = 71 \text{ kHz}$                                                                                                                                                                                                           | 17 hrs  |
|                                                                                        | 2D NC TEDOR                                                                                                              | $B_0 = 18.8 \text{ T}; T_{\text{bearing}} = 305 \text{ K}; \nu_{\text{MAS}} = 14 \text{ kHz}, ns = 256, T_{\text{rd}} = 2.0 \text{ s}, t_{1,\text{max}} = 10 \text{ ms}; t_{1,\text{inc}} = 142.9 \mu\text{s}; T_{\text{dwell}} = 6 \mu\text{s}; T_{\text{acq}} = 12.3 \text{ ms}; T_{\text{HC}} = 0.5 \text{ ms}; T_{\text{NC}} = 1.43 \text{ ms}; \nu_{1\text{Hacq}} = 71 \text{ kHz}$                                                                                                                                                                                                             | 20 hrs  |
|                                                                                        | 2D NC TEDOR                                                                                                              | $B_0 = 18.8 \text{ T}; T_{\text{bearing}} = 263 \text{ K}; \nu_{\text{MAS}} = 14 \text{ kHz}, ns = 256, T_{\text{rd}} = 2.0 \text{ s}, t_{1,\text{max}} = 10 \text{ ms}; t_{1,\text{inc}} = 142.9 \mu\text{s}; T_{\text{dwell}} = 6 \mu\text{s}; T_{\text{acq}} = 12.3 \text{ ms}; T_{\text{HC}} = 0.5 \text{ ms}; T_{\text{NC}} = 1.43 \text{ ms}; \nu_{1\text{Hacq}} = 71 \text{ kHz}$                                                                                                                                                                                                             | 20 hrs  |

|                                         |                                                                                                        |                                                                                                                                                                                                                                                                                                                                                                                                                                                |         |
|-----------------------------------------|--------------------------------------------------------------------------------------------------------|------------------------------------------------------------------------------------------------------------------------------------------------------------------------------------------------------------------------------------------------------------------------------------------------------------------------------------------------------------------------------------------------------------------------------------------------|---------|
| pH 7.5,<br>DMPX, HMA :<br>ETM (4 : 1)   | 2D CC short<br>CORD                                                                                    | $B_0 = 18.8 \text{ T}$ ; $T_{\text{bearing}} = 305 \text{ K}$ ; $\nu_{\text{MAS}} = 14 \text{ kHz}$ , $ns = 96$ , $T_{\text{rd}} = 1.6 \text{ s}$ , $t_{1,\text{max}} = 6.2 \text{ ms}$ ; $t_{1,\text{inc}} = 25.0 \mu\text{s}$ ; $T_{\text{dwell}} = 6.0 \mu\text{s}$ ; $T_{\text{acq}} = 12.2 \text{ ms}$ ; $T_{\text{HC}} = 0.5 \text{ ms}$ ; $T_{\text{CORD}} = 20 \text{ ms}$ ; $\nu_{1\text{Hacq}} = 71 \text{ kHz}$                     | 17 hrs  |
|                                         | 2D NC TEDOR                                                                                            | $B_0 = 18.8 \text{ T}$ ; $T_{\text{bearing}} = 305 \text{ K}$ ; $\nu_{\text{MAS}} = 14 \text{ kHz}$ , $ns = 224$ , $T_{\text{rd}} = 2.0 \text{ s}$ , $t_{1,\text{max}} = 10 \text{ ms}$ ; $t_{1,\text{inc}} = 142.9 \mu\text{s}$ ; $T_{\text{dwell}} = 6 \mu\text{s}$ ; $T_{\text{acq}} = 12.3 \text{ ms}$ ; $T_{\text{HC}} = 0.5 \text{ ms}$ ; $T_{\text{NC}} = 1.43 \text{ ms}$ ; $\nu_{1\text{Hacq}} = 71 \text{ kHz}$                      | 17 hrs  |
| pH 7.5 DMPX<br>AMT : ETM (8<br>: 1)     | 1D $^{19}\text{F}$ DP                                                                                  | $B_0 = 14.1 \text{ T}$ ; $T_{\text{bearing}} = 270 \text{ K}$ ; $\nu_{\text{MAS}} = 14 \text{ kHz}$ , $ns = 10240$ , $T_{\text{rd}} = 1.5 \text{ s}$ , $T_{\text{dwell}} = 6 \mu\text{s}$ ; $T_{\text{acq}} = 6.1 \text{ ms}$ ; $\nu_{1\text{Hacq}} = 71 \text{ kHz}$                                                                                                                                                                          | 4.3 hrs |
|                                         | 1D broadband<br>$^{13}\text{C}$ - $^{19}\text{F}$ REDOR,<br>9.1 ms (S and $S_0$<br>pair)               | $B_0 = 14.1 \text{ T}$ ; $T_{\text{bearing}} = 270 \text{ K}$ ; $\nu_{\text{MAS}} = 14 \text{ kHz}$ , $ns = 5120$ , $T_{\text{rd}} = 1.8 \text{ s}$ , $T_{\text{dwell}} = 8 \mu\text{s}$ ; $T_{\text{acq}} = 6.1 \text{ ms}$ ; $T_{\text{HC}} = 0.5 \text{ ms}$ ;<br>$T_{\text{CFREDOR}}=9.1 \text{ ms}$ ; $\nu_{1\text{HREDOR}} = 117 \text{ kHz}$ ; $\nu_{1\text{Hacq}} = 71 \text{ kHz}$                                                    | 5.2 hrs |
|                                         | 1D broadband<br>$^{13}\text{C}$ - $^{19}\text{F}$ REDOR,<br>11.4 ms (S and<br>$S_0$ pair)              | $B_0 = 14.1 \text{ T}$ ; $T_{\text{bearing}} = 270 \text{ K}$ ; $\nu_{\text{MAS}} = 14 \text{ kHz}$ , $ns = 5120$ , $T_{\text{rd}} = 1.8 \text{ s}$ , $T_{\text{dwell}} = 8 \mu\text{s}$ ; $T_{\text{acq}} = 6.1 \text{ ms}$ ; $T_{\text{HC}} = 0.5 \text{ ms}$ ;<br>$T_{\text{CFREDOR}}=11.4 \text{ ms}$ ; $\nu_{1\text{HREDOR}} = 117 \text{ kHz}$ ; $\nu_{1\text{Hacq}} = 71 \text{ kHz}$                                                   | 5.2 hrs |
|                                         | 1D $\text{Ca}$ -selective<br>$^{13}\text{C}$ - $^{19}\text{F}$ REDOR,<br>10.0 ms (S and<br>$S_0$ pair) | $B_0 = 14.1 \text{ T}$ ; $T_{\text{bearing}} = 270 \text{ K}$ ; $\nu_{\text{MAS}} = 14 \text{ kHz}$ , $ns = 5120$ , $T_{\text{rd}} = 1.8 \text{ s}$ , $T_{\text{dwell}} = 8 \mu\text{s}$ ; $T_{\text{acq}} = 6.1 \text{ ms}$ ; $T_{13\text{C}\alpha\text{sel}} = 286 \mu\text{s}$ ; $T_{\text{HC}} = 0.5 \text{ ms}$ ; $T_{\text{CFREDOR}}=10.0 \text{ ms}$ ; $\nu_{1\text{HREDOR}} = 117 \text{ kHz}$ ; $\nu_{1\text{Hacq}} = 71 \text{ kHz}$ | 5.2 hrs |
|                                         | 1D $\text{Ca}$ -selective<br>$^{13}\text{C}$ - $^{19}\text{F}$ REDOR,<br>14.3 ms (S and<br>$S_0$ pair) | $B_0 = 14.1 \text{ T}$ ; $T_{\text{bearing}} = 270 \text{ K}$ ; $\nu_{\text{MAS}} = 14 \text{ kHz}$ , $ns = 5120$ , $T_{\text{rd}} = 1.8 \text{ s}$ , $T_{\text{dwell}} = 8 \mu\text{s}$ ; $T_{\text{acq}} = 6.1 \text{ ms}$ ; $T_{13\text{C}\alpha\text{sel}} = 286 \mu\text{s}$ ; $T_{\text{HC}} = 0.5 \text{ ms}$ ; $T_{\text{CFREDOR}}=14.3 \text{ ms}$ ; $\nu_{1\text{HREDOR}} = 117 \text{ kHz}$ ; $\nu_{1\text{Hacq}} = 71 \text{ kHz}$ | 5.2 hrs |
|                                         | 2D CC short<br>CORD                                                                                    | $B_0 = 18.8 \text{ T}$ ; $T_{\text{bearing}} = 263 \text{ K}$ ; $\nu_{\text{MAS}} = 14 \text{ kHz}$ , $ns = 96$ , $T_{\text{rd}} = 1.6 \text{ s}$ , $t_{1,\text{max}} = 6.2 \text{ ms}$ ; $t_{1,\text{inc}} = 25.0 \mu\text{s}$ ; $T_{\text{dwell}} = 6.0 \mu\text{s}$ ; $T_{\text{acq}} = 12.2 \text{ ms}$ ; $T_{\text{HC}} = 0.5 \text{ ms}$ ; $T_{\text{CORD}} = 20 \text{ ms}$ ; $\nu_{1\text{Hacq}} = 71 \text{ kHz}$                     | 17 hrs  |
|                                         | 2D NC TEDOR                                                                                            | $B_0 = 18.8 \text{ T}$ ; $T_{\text{bearing}} = 305 \text{ K}$ ; $\nu_{\text{MAS}} = 14 \text{ kHz}$ , $ns = 256$ , $T_{\text{rd}} = 2.0 \text{ s}$ , $t_{1,\text{max}} = 10 \text{ ms}$ ; $t_{1,\text{inc}} = 142.9 \mu\text{s}$ ; $T_{\text{dwell}} = 6 \mu\text{s}$ ; $T_{\text{acq}} = 12.3 \text{ ms}$ ; $T_{\text{HC}} = 0.5 \text{ ms}$ ; $T_{\text{NC}} = 1.43 \text{ ms}$ ; $\nu_{1\text{Hacq}} = 71 \text{ kHz}$                      | 20 hrs  |
| pH 5.0,<br>DMPX<br>No Salt              | 2D CC short<br>CORD                                                                                    | $B_0 = 18.8 \text{ T}$ ; $T_{\text{bearing}} = 305 \text{ K}$ ; $\nu_{\text{MAS}} = 14 \text{ kHz}$ , $ns = 96$ , $T_{\text{rd}} = 1.6 \text{ s}$ , $t_{1,\text{max}} = 6.2 \text{ ms}$ ; $t_{1,\text{inc}} = 25.0 \mu\text{s}$ ; $T_{\text{dwell}} = 10.0 \mu\text{s}$ ; $T_{\text{acq}} = 12.2 \text{ ms}$ ; $T_{\text{HC}} = 0.5 \text{ ms}$ ; $T_{\text{CORD}} = 20 \text{ ms}$ ; $\nu_{1\text{Hacq}} = 71 \text{ kHz}$                    | 17 hrs  |
| pH 5.0,<br>DMPX<br>5 mM $\text{CaCl}_2$ | 2D CC short<br>CORD                                                                                    | $B_0 = 18.8 \text{ T}$ ; $T_{\text{bearing}} = 305 \text{ K}$ ; $\nu_{\text{MAS}} = 14 \text{ kHz}$ , $ns = 96$ , $T_{\text{rd}} = 1.6 \text{ s}$ , $t_{1,\text{max}} = 6.2 \text{ ms}$ ; $t_{1,\text{inc}} = 25.0 \mu\text{s}$ ; $T_{\text{dwell}} = 10.0 \mu\text{s}$ ; $T_{\text{acq}} = 12.2 \text{ ms}$ ; $T_{\text{HC}} = 0.5 \text{ ms}$ ; $T_{\text{CORD}} = 20 \text{ ms}$ ; $\nu_{1\text{Hacq}} = 71 \text{ kHz}$                    | 17 hrs  |
|                                         | 2D NC TEDOR                                                                                            | $B_0 = 18.8 \text{ T}$ ; $T_{\text{bearing}} = 305 \text{ K}$ ; $\nu_{\text{MAS}} = 14 \text{ kHz}$ , $ns = 224$ , $T_{\text{rd}} = 2.0 \text{ s}$ , $t_{1,\text{max}} = 10 \text{ ms}$ ; $t_{1,\text{inc}} = 142.9 \mu\text{s}$ ; $T_{\text{dwell}} = 6 \mu\text{s}$ ; $T_{\text{acq}} = 12.3 \text{ ms}$ ; $T_{\text{HC}} = 0.5 \text{ ms}$ ; $T_{\text{NC}} = 1.43 \text{ ms}$ ; $\nu_{1\text{Hacq}} = 71 \text{ kHz}$                      | 17 hrs  |

Definitions of symbols:  $B_0$  = magnetic field;  $T_{\text{bearing}}$  = thermocouple-reported bearing gas temperature;  $\nu_{\text{MAS}}$  = MAS frequency;  $ns$  = number of scans per free induction decay;  $T_{\text{rd}}$  = recycle delay;  $t_{1,\text{max}}$  = maximum  $t_1$  evolution time;  $t_{1,\text{inc}}$  =  $t_1$  increment;  $t_{2,\text{max}}$  = maximum  $t_2$  evolution time;  $t_{2,\text{inc}}$  =  $t_2$  increment;  $T_{\text{dwell}}$  = dwell-time in the direct dimension;  $T_{\text{acq}}$  = maximum acquisition time in the direct dimension;  $T_{\text{HC}}$  =  $^1\text{H}$ - $^{13}\text{C}$  cross polarization contact time;  $T_{\text{CORD}}$  =  $^{13}\text{C}$ - $^{13}\text{C}$  mixing time using CORD;  $\nu_{1\text{Hacq}}$  =  $^1\text{H}$  rf field strength for decoupling during acquisition;  $T_{\text{NC}}$  = total  $^{15}\text{N}$ - $^{13}\text{C}$  TEDOR recoupling time;  $T_{\text{HN}}$  =  $^1\text{H}$ - $^{15}\text{N}$  cross polarization contact time;  $T_{1\text{Hexc}}$  =  $^1\text{H}$   $90^\circ$  pulse length for selective excitation of water;  $T_{1\text{HSD}}$  =  $^1\text{H}$ - $^1\text{H}$  spin diffusion mixing time;  $T_{13\text{C}\alpha\text{sel}}$  =  $180^\circ$  pulse length for selective inversion of  $\text{Ca}$  resonances;  $T_{\text{CFREDOR}}$  = total  $^{13}\text{C}$ - $^{19}\text{F}$  REDOR recoupling time;  $\nu_{1\text{HREDOR}}$  =  $^1\text{H}$  rf field strength for decoupling during  $^{13}\text{C}$ - $^{19}\text{F}$  REDOR.

## Supplementary Note 1

### Synthesis of F-Amt

The synthetic protocol (Scheme S1) used for preparation of F-Amt was adapted from that described by Jasys and coworkers<sup>44</sup>. Thus, the reaction between 1-adamantanecarboxylic acid and  $\text{KMnO}_4$  afforded 3-hydroxyadamantanecarboxylic acid which was transformed through its tetrabutylammonium salt to the corresponding methyl ester. The fluorination of the hydroxyester was accomplished through treatment with diethylaminosulfur trifluoride (DAST) at  $-50\text{ }^\circ\text{C}$ . The 3-fluoroadamantane-1-amine acetate (F-Amt acetate) was obtained by treatment of 3-fluoroadamantanecarboxylic acid with diphenylphosphorylazide (DPPA) and subsequent hydrogenolysis of the resultant benzyl carbamate.

Scheme S1

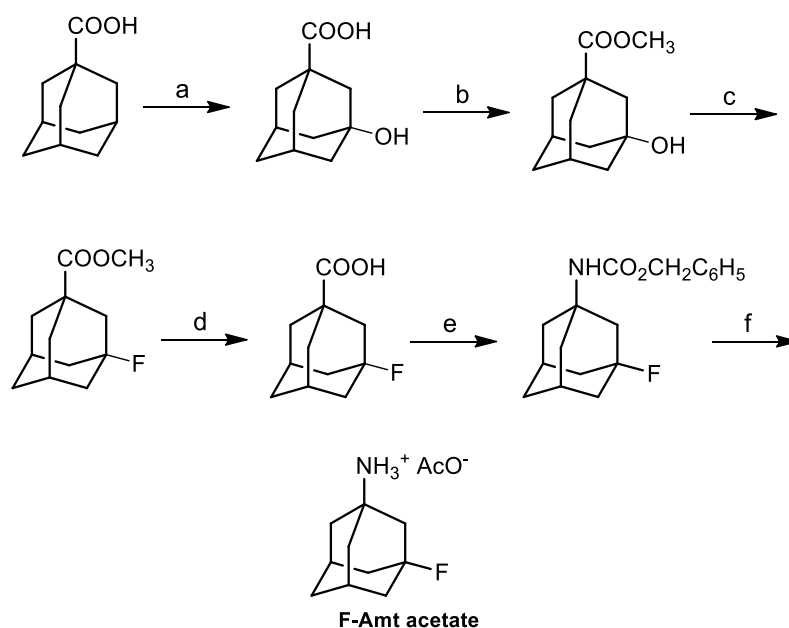

Reagents and Conditions: (a)  $\text{KMnO}_4$ ,  $\text{KOH}$ ,  $50\text{ }^\circ\text{C}$ ; (b)  $\text{TBAHSO}_4$ ,  $\text{NaHCO}_3$ ,  $\text{CH}_3\text{I}$ , acetone, 48 h, r.t.; (c)  $\text{DAST}$ ,  $\text{CH}_2\text{Cl}_2$ , 3 h,  $-50\text{ }^\circ\text{C} \rightarrow 60\text{ }^\circ\text{C}$ ; (d)  $\text{NaOH}$ ,  $\text{MeOH}$ ,  $\text{THF}$ ,  $\text{H}_2\text{O}$ , 24 h, r.t.; (e)  $\text{DPPA}$ ,  $\text{TEA}$ ,  $\text{BnOH}$ , benzene,  $70\text{ }^\circ\text{C}$ ; (f)  $\text{H}_2$ , 10 %  $\text{Pd/C}$ ,  $\text{AcOH}$ .

3-fluoroadamantane-1-amine acetate (F-Amt acetate):  $^1\text{H-NMR}$  (phosphate buffer, pH 7, 10 %  $\text{D}_2\text{O}$ , 500 MHz)  $\delta$  (ppm) 1.60-1.69 (m, 2H, 6-H), 1.87 (s, 4H, 4,10-H), 1.89-1.98 (m, 7H, 8,9-H,  $\text{CH}_3\text{COO}^-$ ), 2.09 (br d, 2H, 2-H), 2.48 (br s, 2H, 5,7-H); LC-MS ( $m/z$ ) 170.3 ( $\text{FC}_{10}\text{H}_{14}\text{NH}_3^+$ ). Base: mp  $210\text{ }^\circ\text{C}$  ( $\text{EtOH-ether}$ );  $^1\text{H-NMR}$  ( $\text{CDCl}_3$ , 400 MHz)  $\delta$  (ppm) 1.41 (br s, 2H, 6-H), 1.49 (br s, 2H,  $\text{NH}_2$ ), 1.51 (br s, 4H, 4,10-H), 1.74 (br d, 2H,  $J = 5.8\text{ Hz}$ , 2-H), 1.79 (br m, 4H, 8,9-H), 2.31 (br s, 2H, 5,7-H);  $^{13}\text{C-NMR}$  ( $\text{CDCl}_3$ , 50 MHz)  $\delta$  (ppm) 31.33, 31.55 (5,7-C), 34.67 (6-C), 41.44, 41.77 (4,10-C), 44.74 (8,9-C), 51.14, 51.47 (2-C, 3-C), 93.29 (d,  $J_{\text{C-F}} = 183.8\text{ Hz}$ , 1-C). Anal. Acetate ( $\text{C}_{12}\text{H}_{20}\text{NO}_2\text{F}$ ) ( $\text{EtOH-Et}_2\text{O}$ ). Calc. C: 62.86 H: 8.79. Found. C: 62.56 H: 8.99.

### Additional membrane sample preparation protocols

Chemical shift assignment and interhelical distance measurements were conducted on ETM bound to an ERGIC-mimetic membrane<sup>42,43</sup> containing 1-palmitoyl-2-oleoyl-glycero-3-

phosphocholine (POPC), 1-palmitoyl-2-oleoyl-sn-glycero-3-phosphoethanolamine (POPE), bovine phosphatidylinositol (PI), 1-palmitoyl-2-oleoyl-sn-glycero-3-phospho-L-serine (POPS), and cholesterol (Chol). The POPC : POPE : PI : POPS : Chol molar ratios were 45 : 20 : 13 : 7 : 15. All lipids were purchased from Avanti Polar Lipids. The membrane has a protein : lipid molar ratio (P : L) of 1 : 20, and 2–4 mg  $^{13}\text{C}$ ,  $^{15}\text{N}$ -labeled protein was used for most 2D and 3D correlation experiments. The intermolecular NHHc spectra were measured using a sample containing 4 mg each of  $^{13}\text{C}$ -labeled ETM and  $^{15}\text{N}$ -labeled ETM. This mixture was reconstituted into the ERGIC membrane at a P : L of 1 : 10 to increase the experimental sensitivity.  $^{13}\text{C}$ - $^{19}\text{F}$  REDOR experiments were conducted on 3.7 mg total of 1 : 1 mixed  $^{13}\text{C}$ -labeled and fluorinated ETM bound to the ERGIC membrane at P : L = 1 : 10.

To reconstitute ETM into lipid bilayers, we dissolved 2 mg protein in 1 mL trifluoroethanol (TFE) and mixed with appropriate amounts of lipids in 400  $\mu\text{L}$  chloroform. For the HMA-bound sample, HMA was dissolved in TFE (1 mg/100  $\mu\text{L}$ ) and added to the protein-lipid mixture. The organic solvents were removed under a gentle stream of nitrogen gas, and the film was dried under vacuum at room temperature overnight. The proteoliposome film was resuspended in 3 mL of pH 7.5 sample buffer by vortexing and sonicating 2-3 times for 5 min until the suspension was homogenous. This was followed by 7 freeze-thaw cycles between a 42°C water bath and liquid nitrogen. The proteoliposomes were then pelleted using ultracentrifugation for 3 hours at 164,000x g and 4°C. The pellet was dried in a desiccator or under a gentle stream of nitrogen gas to a final hydration level of ~40% by mass and then packed into an appropriate MAS rotor using a benchtop centrifuge.

Drug binding to ETM was assessed in a “DMPX” membrane consisting of 1,2-dimyristoyl-sn-glycero-3-phosphocholine (DMPC) : 1,2-dimyristoyl-sn-glycero-3-phospho-(1'-rac-glycerol) (DMPG) at a 80% : 20% molar ratio. The mixture was chosen to maintain the same 20% anionic lipid fraction as the ERGIC membrane. A drug-free sample contained 2 mg of U- $^{13}\text{C}$ ,  $^{15}\text{N}$ -labeled ETM bound to the membrane at a P : L of 1 : 20. The sample containing 5-(N,N-hexamethylene)-amiloride (HMA) was prepared using a protein : drug (P : D) molar ratio of 1 : 1, with HMA (0.2 mg) added during organic solution mixing. The same P : L of 1:20 as the apo sample was used. After initial spectra showed only small CSPs, we titrated an additional 0.6 mg of HMA in 6  $\mu\text{L}$  dimethyl sulfoxide (DMSO) into the proteoliposome, giving a P : D of 1 : 4. The solubility of HMA in aqueous solutions was very low (< 0.1 mg/ml), necessitating the use of DMSO. 3- $^{19}\text{F}$ -amantadine (AMT) was titrated into the proteoliposome stepwise, from an initial P : D molar ratio of 1 : 1 to a final P : D of 1 : 8. The protein/lipid molar ratio of the sample is 1 : 15. The fluorinated AMT has high solubility in water, thus can be mixed with the membrane directly. For the  $^{13}\text{C}$ - $^{19}\text{F}$  REDOR experiments, the sample was packed in a 1.9 mm MAS rotor, while chemical shift measurements were conducted in a 3.2 mm MAS rotor on the 800 MHz spectrometer.

Chemical shift changes under acidic pH and with added calcium were assessed in the same “DMPX” membrane. The sample with 5 mM  $\text{CaCl}_2$  at pH 5 contained 2 mg of U- $^{13}\text{C}$ ,  $^{15}\text{N}$ -labeled ETM bound to the membrane at a P : L of 1 : 20, while the sample without calcium contained 2 mg of U- $^{13}\text{C}$ -labeled ETM bound to the membrane at a P : L of 1 : 20.

### **Simulation of $^{13}\text{C}$ - $^{19}\text{F}$ REDOR curves**

$^{13}\text{C}$ - $^{19}\text{F}$  REDOR data were simulated using the SIMPSON software<sup>55</sup>. The simulations accounted for finite  $^{19}\text{F}$  and  $^{13}\text{C}$  180° pulse lengths and  $^{19}\text{F}$  pulse imperfections by co-adding REDOR curves for  $^{19}\text{F}$  flip angles of 180° to 145° using a normal distribution centered at 180° with a standard deviation of 15°<sup>50</sup>. The simulations also included  $^{19}\text{F}$  chemical shift anisotropy (CSA), which was measured from the  $^{19}\text{F}$  CSA sideband patterns in spectra measured at 293 K under 14 kHz MAS. The sideband intensities were fit using the Solids Lineshape Analysis module in Topspin. The

best-fit CSA was  $\delta_{\text{CSA}} = 55 \pm 2$  ppm and  $\eta = 0.6 \pm 0.1$  for the  $^{19}\text{F}$  peak at  $\delta_{\text{iso}} = -113.5$  ppm and  $\delta_{\text{CSA}} = 53 \pm 2$  ppm and  $\eta = 0.5 \pm 0.1$  for the  $^{19}\text{F}$  peak at  $\delta_{\text{iso}} = -117.5$  ppm. These CSAs indicate that all three 4- $^{19}\text{F}$ -Phe residues are immobilized.

REDOR distance analysis required two other considerations. First, the 1 : 1  $^{13}\text{C}$  and  $^{19}\text{F}$  mixed peptides means that only 50% of all  $^{13}\text{C}$ -labeled helices have an adjacent  $^{19}\text{F}$ -labeled helix. Thus, the lowest possible REDOR  $S/S_0$  value is 0.5. Second, while most  $^{13}\text{C}$ - $^{19}\text{F}$  REDOR restraints came from 2D  $^{13}\text{C}$ - $^{13}\text{C}$  resolved peaks, dephasing to sidechain carbons were obtained from 1D  $^{13}\text{C}$  spectra with resonance overlap. These overlapped peaks will not experience complete dipolar dephasing if some of the carbons contributing to an overlapped signal are far from a fluorine. We first identified the residues experiencing dephasing by  $^{19}\text{F}$  from the 2D  $^{13}\text{C}$ - $^{13}\text{C}$  correlation spectra. These peaks then guided the assignment of the 1D  $^{13}\text{C}$ - $^{19}\text{F}$  spectra. For example, both A22 and A32 C $\beta$  resonate at 16.6 ppm, but only A22 C $\alpha$  is dephased in the 2D  $^{13}\text{C}$ - $^{13}\text{C}$  spectrum (**Fig. 2b**). Thus, we assigned the 16.6 ppm dephased signal in the 1D  $^{13}\text{C}$ - $^{19}\text{F}$  REDOR spectra to A22 C $\beta$ . Making the reasonable assumption that each Ala C $\beta$  contributes equal intensity, we account for this overlap factor by correcting the experimental dephasing  $(S/S_0)_{\text{exp}}$  values according to:

$$(S/S_0)_{\text{adj}} = 1 - \left[ 2 \times \left( 1 - (S/S_0)_{\text{exp}} \right) \times f \right] \quad (2)$$

where  $f$  is the fraction of an overlapped  $^{13}\text{C}$  peak that is dephased by  $^{19}\text{F}$ . For example, for the 2-fold overlapped 16.6-ppm Ala C $\beta$  peak with  $f = 2$ , the lowest possible  $(S/S_0)_{\text{exp}}$  value is  $\sim 0.75$ , which gives a minimal  $(S/S_0)_{\text{adj}}$  of  $\sim 0.0$ .

The random uncertainty  $\sigma(S/S_0)_{\text{exp}}$  of the measured  $(S/S_0)_{\text{exp}}$  values were propagated from the signal-to-noise ratios (SNRs) of the REDOR  $S_0$  and  $S$  spectra. The upper and lower limits for the  $(S/S_0)_{\text{adj}}$  values were obtained by adding or subtracting the  $\sigma(S/S_0)_{\text{exp}}$  to the  $(S/S_0)_{\text{exp}}$  values before using equation (2), respectively. Best-fit distances were obtained as the distance with the lowest  $\chi^2$  value between the  $(S/S_0)_{\text{adj}}$  values and simulated  $S/S_0$  intensities. Upper and lower distance limits were specified using the upper and lower limits for the  $(S/S_0)_{\text{adj}}$  values calculated as described above. For an upper limit of  $(S/S_0)_{\text{adj}} > 0.95$  indicating a negative contact (i.e. dephasing was not significant), an upper limit of 50 Å was used. The final lower and upper distance limits for structure calculation were set by multiplying the uncertainty obtained in this manner by 2 times or by choosing distances that are 2.0 Å from the best-fit value, whichever was larger, to loosen the constraints.

### **Docking of HMA to ETM structure**

The coordinate file for HMA was generated from bond connectivity using the Chem3D module of ChemDraw Professional 18.1. Ligand geometry was optimized within Chem3D using the MM2 energy minimization module. Docking was performed using the HADDOCK 2.4 webserver using the ensemble of the ten lowest-energy protein structures calculated in XPLOR-NIH. The docking was constrained only with an active list. Active residues were defined as the N-terminal residues with significant CSPs (**Fig. 4c**), including T9, G10, T11, I13, and S16. Several docking runs were conducted using constraints to this list of residues on all helices, one of the five helices, and different combinations of two of the five helices. Docking calculations were performed using default settings in the HADDOCK 2.4 webserver interface, except that the solvent for the final structural refinement were varied as DMSO and water. The N- and C-termini were set as uncharged as the structural model does not include the full protein sequence. Passive residues were automatically defined around the active residues with a 6.5 Å surface radius cutoff. Non-polar hydrogens were removed from the calculation, and 2 partitions for random exclusion of Ambiguous Interaction Restraints ('AIRs') were used (50% of AIRs were randomly excluded in

the calculation). The docking used 1000 structures for rigid-body docking with 5 trials of rigid-body minimization. Semi-flexible refinement was done with 200 structures selected from the rigid-body minimization stage. Final refinement with explicit solvent (DMSO or water) were performed on all 200 structures from semi-flexible refinement. Output structures were aligned and analyzed in Pymol 2.3.5.

In docking with DMSO as a refinement solvent, 200 refined structures were grouped into 5 clusters, with 154 structures belonging to the lowest energy cluster 1. The four best structures of this cluster had an average HADDOCK score of  $-29.8 \pm 2.1$ , and a Z-score of  $-1.7$ . Similar results were obtained with docking with water as a refinement solvent, the 200 refined structures were grouped into three clusters, where cluster 1 contained 170 structures. The four best structures this cluster had a HADDOCK score of  $-29.3 \pm 1.9$ , with a Z-score of  $-1.4$ .

The majority of docked structures converged to a state where HMA partitioned to the N-terminal entry cavity of the channel, but the HMA orientation is variable. Visual inspection showed three distinct orientations: 1) HMA tilted and diving into the pore with the hexamethylene ring facing up (**Extended Data Fig. 9a**), 2) HMA tilted and diving into the pore with the ring facing down (**Extended Data Fig. 9b**), 3) HMA laying horizontally across the top of the channel, with the guanidinium intercalated between two helices (**Extended Data Fig. 9c**). Among the 32 lowest energy structures in the DMSO and water docking results, 13/32 structures belonged to the first mode (ring up), 6/32 to the second mode (ring down), and 13/32 to the third mode (horizontal). All these modes indicate a pore-occlusion mechanism, similar to the amantadine inhibition mechanism of the influenza AM2 proton channel<sup>9</sup>.

Given the hydrophobic nature of HMA, another possible binding mode would be drug binding from the lipid side to the exterior of the helical bundle. This mode could explain the chemical shift perturbation of the lipid-facing S16, but the mechanism of inhibition would be indirect allosteric narrowing of the pore, and would require multiple drug molecules to bind each pentamer to preserve the symmetry, as only a single set of peaks are observed in the drug-bound protein spectra. Thus we consider this mechanism less likely than direct occlusion of the pore. The lipid-binding mode was only observed in docking runs with only one or two helices containing the active residues.
